# Supplementary material for: Tuning the upconversion luminescence of cubic KMnF3:Yb3+/Er3+ nanocrystals through inert lanthanide ion doping
Source: Royal Society of Chemistry journal article supplement (doi:10.1039/c9tc06288b), 2020-01-01
Supplement: c9tc06288b1.pdf [file c9tc06288b1.pdf]

Electronic Supporting Information for:

**Tuning the Upconversion Luminescence of Cubic  $\text{KMnF}_3:\text{Yb}^{3+}/\text{Er}^{3+}$   
Nanocrystals through Inert Lanthanide Ions Doping**

*Yunfei Shang*<sup>a</sup>, *Shuwei Hao*<sup>a,b,\*</sup>, *Wei Shao*<sup>c</sup>, *Tong Chen*<sup>a</sup>, *Yuyan Zhu*<sup>a</sup>, and *Chunhui Yang*<sup>\*  
a,b,c</sup>

<sup>a</sup> MIIT Key Laboratory of Critical Materials Technology for New Energy Conversion and Storage, School of Chemistry and Chemical Engineering, Harbin Institute of Technology, Harbin 150001, China.

<sup>b</sup> Key Laboratory of Micro-systems and Micro-structures Manufacturing of Ministry of Education, Harbin Institute of Technology

<sup>c</sup> Department of Chemical Engineering and State Key Laboratory Breeding Base of Green Chemistry Synthesis Technology, Zhejiang University of Technology, Hangzhou 310014, China.

<sup>d</sup> State Key Laboratory of Urban Water Resource and Environment, Harbin Institute of Technology

Corresponding Author:

\* *E-mail: haosw@hit.edu.cn (Shuwei Hao); yangchh@hit.edu.cn (Chunhui Yang)*

## Experimental section

### Materials

YbCl<sub>3</sub>·6H<sub>2</sub>O (99.99%), ErCl<sub>3</sub>·6H<sub>2</sub>O (99.99%), GdCl<sub>3</sub>·6H<sub>2</sub>O (99.99%), YCl<sub>3</sub>·6H<sub>2</sub>O (99.99%) were supplied by Beijing Founde Star Science and Technology Co., Ltd China. MnCl<sub>2</sub>, KF, KOH, oleic acid (OA) at AR grade were obtained from Aladdin. All other chemicals were used without further purification.

### Typical preparation of KMnF<sub>3</sub> nanoparticles

KMnF<sub>3</sub>:Yb<sup>3+</sup>/Er<sup>3+</sup> nanoparticles were synthesized via a facile hydrothermal method by using oleic acid as capping agent. In a typical procedure, 1.5g KOH was dissolved in 3mL H<sub>2</sub>O, then 6 mL C<sub>2</sub>H<sub>5</sub>OH and 9 mL OA were mixed together to form a homogeneous viscous solution. A mixed aqueous solution contains 0.88 mmol MnCl<sub>2</sub>, 0.10 mmol YbCl<sub>3</sub>, 0.02 mmol ErCl<sub>3</sub> was subsequently added under intense stirring. 30 mins later, 5 mmol KF aqueous solution was added to the above solution. After another 1h strong stirring, the mixed solution was transferred to a 50 mL Teflon-lined autoclave, and then kept at 180 °C for 24h. When the reaction is over, the autoclave was cooling down to room temperature, and the products were obtained through centrifugation and washed with ethanol for several times.

### Characterizations

The morphology and size of the resulting nanoparticles were investigated by means of field emission scanning electron microscope (FESEM, MX2600FE, AIKE Sepp, Oxford, UK). The powder X-Ray diffraction (XRD) pattern was carried out on a Rigaku D/max-γB diffractometer equipped with a rotating anode and a Cu Kα source (λ=0.15418 nm). The 2θ angle of the XRD

spectra was recorded at a scanning rate of 5 °/min from 10° to 80°. The upconversion luminescence spectra were recorded using a lens-coupled monochromator (Zolix Instruments Co. Ltd, Beijing, China) of 1 nm spectral resolution with an attached photomultiplier tube (Hamamatsu CR131, Hamamatsu Photonics, Hamamatsu, Japan). An 842 nm short pass filter was placed before the spectrometer to cut off the excitation light.

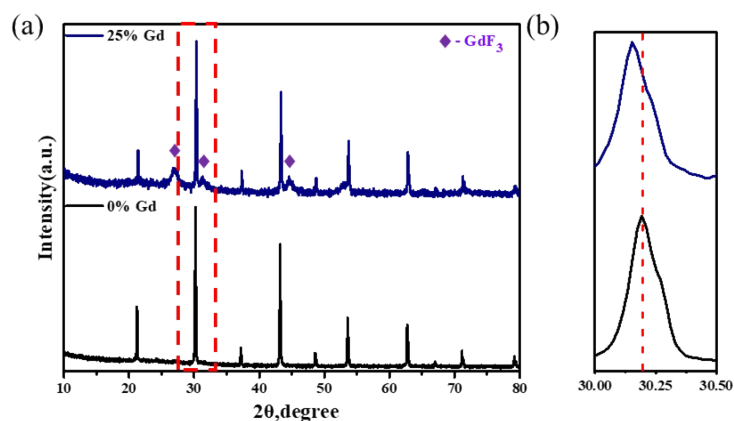

**Figure S1.** (a) and (b) the enlarged XRD patterns comparison of  $\text{KMnF}_3:10\text{Yb}^{3+}/2\text{Er}^{3+}$  nanocrystals doped with 0% and 25%  $\text{Gd}^{3+}$  ions.

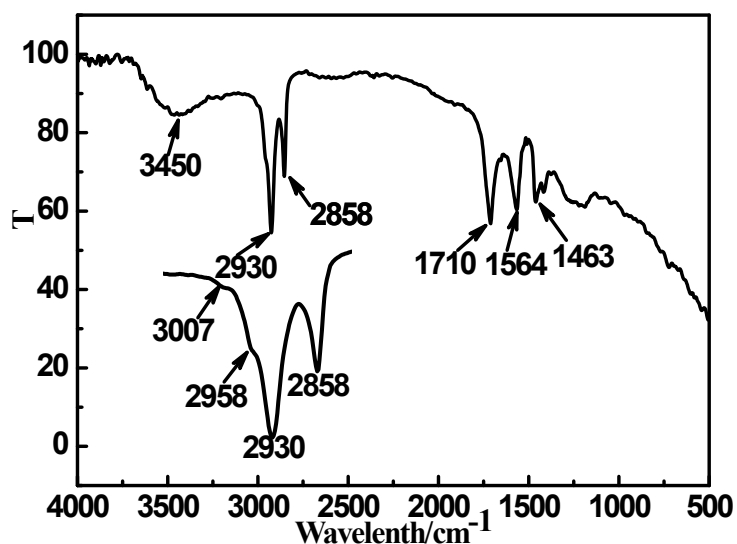

**Figure S2.** Fourier transform infrared (FTIR) patterns of  $\text{KMnF}_3:10\text{Yb}^{3+}/2\text{Er}^{3+}$  nanoparticles. The surfactant layer around the nanoparticles is identified with Fourier transform infrared (FTIR) analysis. The band at  $3450\text{ cm}^{-1}$  arises from the O-H (COO-H) stretching vibration. The transmission bands at  $2930$  and  $2858\text{ cm}^{-1}$  are appreciable for the asymmetric (vas) and symmetric (vs) stretching vibration of methylene ( $\text{CH}_2$ ). The peaks at  $3007\text{ cm}^{-1}$  and  $1705\text{ cm}^{-1}$  are assigned to the dC-H stretching vibration and CdO stretching vibration frequency, respectively. The bands at  $1564$  and  $1463\text{ cm}^{-1}$  can correspond to the asymmetric (vas) and symmetric (vs) stretching vibration of the carboxylic group ( $-\text{COOH}$ ). This result suggests the

presence of a certain amount of oleic acid on the surface of cubic nanoparticles.

**Table S1.** Calculated CIE Chromaticity Coordinate ( $x, y$ ) of  $\text{KMnF}_3:10\text{Yb}^{3+}/2\text{Er}^{3+}$  nanoparticles with different  $\text{Gd}^{3+}$  dopant

| Point | samples                                                           | CIE chromaticity coordinate |        |
|-------|-------------------------------------------------------------------|-----------------------------|--------|
|       |                                                                   | $x$                         | $y$    |
| a     | $\text{KMnF}_3:10\text{Yb}^{3+}/2\text{Er}^{3+}$                  | 0.6621                      | 0.2847 |
| b     | $\text{KMnF}_3:10\text{Yb}^{3+}/2\text{Er}^{3+}/5\text{Gd}^{3+}$  | 0.6126                      | 0.3256 |
| c     | $\text{KMnF}_3:10\text{Yb}^{3+}/2\text{Er}^{3+}/10\text{Gd}^{3+}$ | 0.4943                      | 0.4402 |
| d     | $\text{KMnF}_3:10\text{Yb}^{3+}/2\text{Er}^{3+}/15\text{Gd}^{3+}$ | 0.4756                      | 0.4790 |
| e     | $\text{KMnF}_3:10\text{Yb}^{3+}/2\text{Er}^{3+}/20\text{Gd}^{3+}$ | 0.4203                      | 0.4996 |
| f     | $\text{KMnF}_3:10\text{Yb}^{3+}/2\text{Er}^{3+}/25\text{Gd}^{3+}$ | 0.3332                      | 0.6211 |

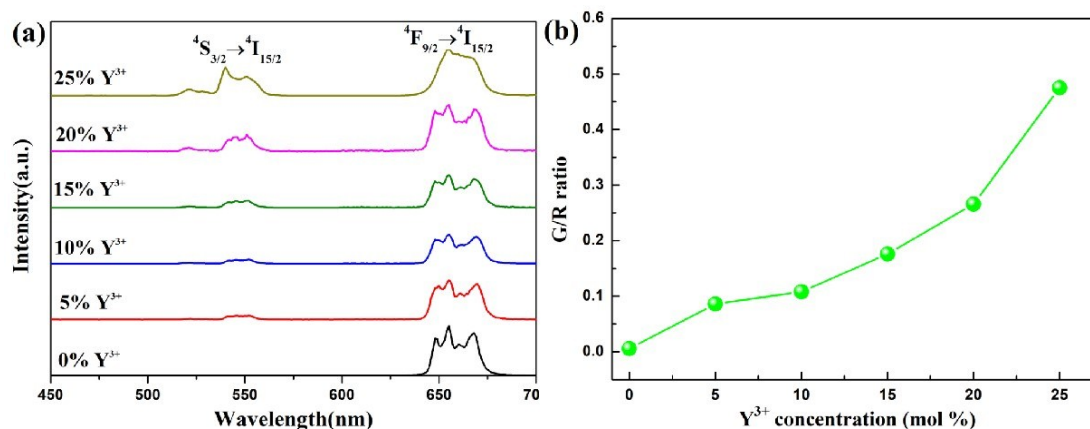

**Figure S3.** UC emission spectra (a) and G/R ratio (b) of  $\text{KMnF}_3:10\text{Yb}^{3+}/2\text{Er}^{3+}$  with different  $\text{Y}^{3+}$  doping concentrations.

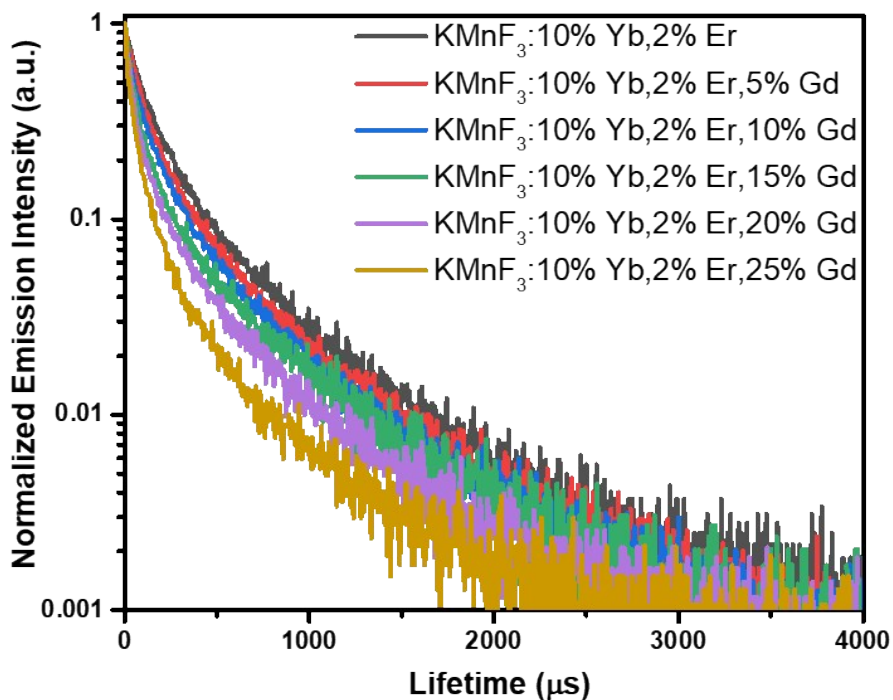

**Figure S4.** Decays of red upconversion emission at 660nm in  $\text{KMnF}_3:10\text{Yb}^{3+}/2\text{Er}^{3+}$  nanocrystals with different concentration of  $\text{Gd}^{3+}$  ions: 0% to 25% under the excitation of 980 nm laser.

**Table S2.** Cell edges and agreement factors of  $\text{KMnF}_3:10\text{Yb}^{3+}/2\text{Er}^{3+}$  with different  $\text{Gd}^{3+}$  doping concentrations by XRD define.

| Sample | a/b/c (Å) | Cell Volume (Å <sup>3</sup> ) | RF-factor |
|--------|-----------|-------------------------------|-----------|
| 0% Gd  | 4.18781   | 73.44478                      | 4.298     |
| 5% Gd  | 4.18826   | 73.46845                      | 2.683     |
| 10% Gd | 4.18838   | 73.47477                      | 3.530     |
| 15% Gd | 4.18891   | 73.50267                      | 3.359     |
| 20% Gd | 4.18937   | 73.52688                      | 3.337     |
| 25% Gd | 4.19033   | 73.57744                      | 5.932     |
